# Supplementary material for: Integrative multi-omics identifies regulatory and exhausted T cell types and novel immunotherapy targets in CLL lymph nodes
Source: Research Square preprint supplement (doi:10.21203/rs.3.rs-3909204/v1), 2024-03-29
Supplement: Supplementary file 1 [file 1fc73bf2890554dcdc1dbbb1.xlsx]

## Sheet: VDJDB
Sample	TCR chain	clonotype_id	count	freq	cdr3nt	cdr3aa	v	d	j	VEnd	DStart	DEnd	JStart	id.in.sample	match.score	match.weight	gene	cdr3	species	antigen.epitope	antigen.gene	antigen.species	complex.id	v.segm	j.segm	v.end	j.start	mhc.a	mhc.b	mhc.class	reference.id	vdjdb.score
BC0	TRA	clonotype50	2	0.000683527	TGTGCAGAGAACACCGGTAACCAGTTCTATTTT	CAENTGNQFYF	TRAV5	.	TRAJ49	452	-1	-1	-1	57	0.298042	1	TRA	CARNTGNQFYF	HomoSapiens	NLVPMVATV	pp65	CMV	2.58472e+72	TRAV24*01,TRAV12-2*01,TRAV12-3*01	TRAJ49*01	2	3	HLA-A*02:01:98,HLA-A*02:01,HLA-A*02	B2M	MHCI	PMID:28423320,PMID:16237109,PMID:19542454,PMID:28934479,https://github.com/antigenomics/vdjdb-db/issues/288,PMID:28636592,https://github.com/antigenomics/vdjdb-db/issues/252	3
		clonotype50	2	0.000683527	TGTGCAGAGAACACCGGTAACCAGTTCTATTTT	CAENTGNQFYF	TRAV5	.	TRAJ49	452	-1	-1	-1	57	0.375851	1	TRA	CAHNTGNQFYF	HomoSapiens	KLVALGINAV	NS3	HCV	446	TRAV38-2/DV8*01	TRAJ49*01	2	3	HLA-A*02	B2M	MHCI	PMID:27252176	3
		clonotype45	2	0.000683527	TGTGCTTCATATTATGGAGGAAGCCAAGGAAATCTCATCTTT	CASYYGGSQGNLIF	TRAV36/DV7	.	TRAJ42	362	-1	-1	-1	51	0.457801	1	TRA	CASDYGGSQGNLIF	HomoSapiens	FRDYVDRFYKTLRAEQASQE	Gag	HIV-1	0	TRAV24*01	TRAJ42*01	2	4	HLA-DRA*01,HLA-DRA*01:01	HLA-DRB5*01:01,HLA-DRB1*15:02,HLA-DRB1*01:01,HLA-DRB1*11:01,HLA-DRB1*07:01	MHCII	PMID:27111229,PMID:28993513	3
BC1	TRA	clonotype27	4	0.0019685	TGTGCTGTGTCCAGAGATGACAAGATCATCTTT	CAVSRDDKIIF	TRAV8-6	.	TRAJ30	554	-1	-1	-1	29	0.312614	1	TRA	CAVNRDDKIIF	HomoSapiens	YLQPRTFLL	Spike	SARS-CoV-2	2.48143e+42	TRAV12-2*01	TRAJ30*01	4	3	HLA-A*02:01,HLA-A*02:01:48,HLA-A*02	B2M	MHCI	https://github.com/antigenomics/vdjdb-db/issues/326,https://github.com/antigenomics/vdjdb-db/issues/315,https://github.com/antigenomics/vdjdb-db/issues/215,PMID:33951417	3
		clonotype73	2	0.000984252	TGTGCAGCGTCAGGAACCTACAAATACATCTTT	CAASGTYKYIF	TRAV29/DV5	.	TRAJ40	402	-1	-1	-1	77	0.349886	1	TRA	CATSGTYKYIF	HomoSapiens	KLVALGINAV	NS3	HCV	449	TRAV38-2/DV8*01		2	-1	HLA-A*02	B2M	MHCI	PMID:27252176	3
		clonotype55	2	0.000984252	TGTGCTGTCCTCATGGATAGCAACTATCAGTTAATCTGG	CAVLMDSNYQLIW	TRAV21	.	TRAJ33	451	-1	-1	-1	57	0.330134	1	TRA	CAVFMDSNYQLIW	HomoSapiens	KLVALGINAV	NS3	HCV	0	TRAV8-1*01	TRAJ33*01	3	5	HLA-A*02	B2M	MHCI	PMID:27252176	3
		clonotype84	2	0.000984252	TGCGCTGTGAGAGATGGGAACTCTGGGGCTGGGAGTTACCAACTCACTTTC	CAVRDGNSGAGSYQLTF	TRAV1-1	.	TRAJ28	394	-1	-1	-1	88	0.373893	1	TRA	CAVRDINSGAGSYQLTF	HomoSapiens	SLLMWITQV	NY-ESO-1	HomoSapiens	328	TRAV3*01	TRAJ28*01	5	7	HLA-A*02:01:48	B2M	MHCI	PMID:32102902	3
BC2	TRA	clonotype1	25	0.0239234	TGTGCTGTTCTCATGGATAGCAACTATCAGTTAATCTGG	CAVLMDSNYQLIW	TRAV21	.	TRAJ33	470	-1	-1	-1	0	0.330134	1	TRA	CAVFMDSNYQLIW	HomoSapiens	KLVALGINAV	NS3	HCV	0	TRAV8-1*01	TRAJ33*01	3	5	HLA-A*02	B2M	MHCI	PMID:27252176	3
		clonotype5	5	0.00478469	TGTGCCCGAAACACCGGTAACCAGTTCTATTTT	CARNTGNQFYF	TRAV24	.	TRAJ49	397	-1	-1	-1	4	1	1	TRA	CARNTGNQFYF	HomoSapiens	NLVPMVATV	pp65	CMV	2.58472e+72	TRAV24*01,TRAV12-2*01,TRAV12-3*01	TRAJ49*01	2	3	HLA-A*02:01:98,HLA-A*02:01,HLA-A*02	B2M	MHCI	PMID:28423320,PMID:16237109,PMID:19542454,PMID:28934479,https://github.com/antigenomics/vdjdb-db/issues/288,PMID:28636592,https://github.com/antigenomics/vdjdb-db/issues/252	3
		clonotype5	5	0.00478469	TGTGCCCGAAACACCGGTAACCAGTTCTATTTT	CARNTGNQFYF	TRAV24	.	TRAJ49	397	-1	-1	-1	4	0.262854	1	TRA	CAHNTGNQFYF	HomoSapiens	KLVALGINAV	NS3	HCV	446	TRAV38-2/DV8*01	TRAJ49*01	2	3	HLA-A*02	B2M	MHCI	PMID:27252176	3
	TRB	clonotype5	5	0.00478469	TGTGCCAGCAGTTACCAAACGGGGGCTTCCTATGGCTACACCTTC	CASSYQTGASYGYTF	TRBV6-5	.	TRBJ1-2	418	-1	-1	-1	4	0.769076	1	TRB	CASSYQTGASYGYTF	HomoSapiens	NLVPMVATV	pp65	CMV	0	TRBV6-3*01,TRBV6-1*01,TRBV6-5*01	TRBJ1-2*01	5	10	HLA-A*02:01,HLA-A*02	B2M	MHCI	PMID:28423320,PMID:24069285,PMID:21555537	3
		clonotype5	5	0.00478469	TGTGCCAGCAGTTACCAAACGGGGGCTTCCTATGGCTACACCTTC	CASSYQTGASYGYTF	TRBV6-5	.	TRBJ1-2	418	-1	-1	-1	4	0.719198	1	TRB	CASSYQTGAAYGYTF	HomoSapiens	NLVPMVATV	pp65	CMV	0	TRBV6-3*01,TRBV6-5*01	TRBJ1-2*01	5	10	HLA-A*02:01	B2M	MHCI	PMID:25801351,PMID:21135165,PMID:24069285,PMID:23267020,PMID:19017975,PMID:24512815	3
		clonotype5	5	0.00478469	TGTGCCAGCAGTTACCAAACGGGGGCTTCCTATGGCTACACCTTC	CASSYQTGASYGYTF	TRBV6-5	.	TRBJ1-2	418	-1	-1	-1	4	0.949609	1	TRB	CASSFQTGASYGYTF	HomoSapiens	NLVPMVATV	pp65	CMV	744	TRBV6-5*01	TRBJ1-2*01	4	10	HLA-A*02:01	B2M	MHCI	PMID:16237109,https://github.com/antigenomics/vdjdb-db/issues/252	3
		clonotype12	3	0.00287081	TGTGCCACTGGGACAGGGGATAGCAATCAGCCCCAGCATTTT	CATGTGDSNQPQHF	TRBV10-3	TRBD1	TRBJ1-5	371	-1	-1	-1	11	1	1	TRB	CATGTGDSNQPQHF	HomoSapiens	EPLPQGQLTAY	BZLF1	EBV	21991130	TRBV10-3*01	TRBJ1-5*01	2	7	HLA-B*35:01,HLA-B*35:42:01	B2M	MHCI	PMID:23028307,PMID:16148129,PMID:17259989	3
		clonotype12	3	0.00287081	TGTGCCACTGGGACAGGGGATAGCAATCAGCCCCAGCATTTT	CATGTGDSNQPQHF	TRBV10-3	TRBD1	TRBJ1-5	371	-1	-1	-1	11	0.229582	1	TRB	CASGTGDSNQPQHF	HomoSapiens	EPLPQGQLTAY	BZLF1	EBV	21990	TRBV12-5*01	TRBJ1-5*01	4	7	HLA-B*35:01	B2M	MHCI	PMID:16148129	3
BC3	TRA	clonotype20	5	0.00200481	TGTGCTCTAACGTCCAGCAACACAGGCAAACTAATCTTT	CALTSSNTGKLIF	TRAV16	.	TRAJ37	539	-1	-1	-1	20	0.384119	1	TRA	CALLSSNTGKLIF	HomoSapiens	KLVALGINAV	NS3	HCV	471	TRAV12-3*01	TRAJ37*01	2	6	HLA-A*02	B2M	MHCI	PMID:27252176	3
	TRB	clonotype13	7	0.00280674	TGTGCCAGCAGTTACGGGGGTTACGAGCAGTACTTC	CASSYGGYEQYF	TRBV6-5	.	TRBJ2-7	410	-1	-1	-1	12	0.789715	1	TRB	CASSYGSYEQYF	HomoSapiens	KLVALGINAV	NS3	HCV	446	TRBV6-6*01	TRBJ2-7*01	5	6	HLA-A*02	B2M	MHCI	PMID:27252176	3
		clonotype26	4	0.00160385	TGTGCCAGCAGCCTGGGACAGGGAGATCAGCCCCAGCATTTT	CASSLGQGDQPQHF	TRBV9	TRBD1	TRBJ1-5	394	-1	-1	-1	26	0.29939	1	TRB	CASSLSQGDQPQHF	HomoSapiens	PKYVKQNTLKLAT	HA	InfluenzaA	0	TRBV12-3*01	TRBJ1-5*01	5	9	HLA-DRA*01	HLA-DRB1*01	MHCII	PMID:12466894	3
BC9	None expanded
