# Supplementary material for: Integrative multi-omics identifies regulatory and exhausted T cell types and novel immunotherapy targets in CLL lymph nodes
Source: Research Square preprint supplement (doi:10.21203/rs.3.rs-3909204/v1), 2024-03-29
Supplement: Supplementary file 2 [file 2fdc1deae4b17b935c3b7768.xlsx]

## Sheet: Clinical data of CLL patients
Patient ID	Tissue	Age at diagnosis	Age at sampling	Sex	Diagnosis	Binet staging	Rai staging	Tumor Load (% CD5 CD19)	IGHV status	Family	TP53	trisomy 12	del13q14	del11q	del17p13	Komplex aberrant karyotype	Treatment status	Alive	Time to first treatment (months)	Diagnosis to death (months)	Overall survival (years)	Mass Cytometry	scRNAseq
BC0	LN					B	II		UNMUTATED			No	No	No	No	No	Untreated					No	Yes
BC1	PB	70	72.1973	MALE	CLL	B	I	41.8	MUTATED	IGHV3-23	del17p 41%	Yes (22%)	Yes (31%)	No	Yes (41%)	46,XY,t(1;19)(q23;p13),der(7),+12,del(13)(q14q21),add(15)(p10),del(17)(p12),17[cp3]/46,XY,t(11;14)[1]/46,XY[16]	Untreated	No	26.3	74.9	76.4548	Yes	No
BC1	LN	70	72.2904	MALE	CLL	B	I	92	MUTATED	IGHV3-23	del17p 62%	Yes (43%)	Yes (47%)	No	Yes (62%)		Untreated	No	26.3	74.9	76.4548	Yes	Yes
BC2	LN	69	69.1096	MALE	CLL	B	I	88	UNMUTATED	IGHV1-24	normal	No	No	Yes (65%)	No	No	Untreated	Yes	2.9	NA	NA	Yes	Yes
BC3	LN	57	57.5123	FEMALE	CLL	B	I	79.2	UNMUTATED	IGHV69-01	normal	NA					Untreated	Yes	NA	NA	NA	Yes	Yes
BC3	BM	57	57.9836	FEMALE	CLL	B	I	83.42	UNMUTATED	IGHV69-01	normal	No	No	No	Yes (13%)		Untreated	Yes	NA	NA	NA	Yes	No
BC4	LN	53	56.6027	MALE	CLL	A	0	76.26	MUTATED	IGHV3-23	normal	No	No	No	No	No	Treated	Yes	39.3333	NA	NA	Yes	No
BC5	PB	46	45.7178	FEMALE	CLL	NA	NA	64.17	MUTATED	IGHV2-70	normal	Yes (90%)	No	No	No	No	Untreated	Yes	NA	NA	NA	Yes	No
BC5	LN	46	47.1589	FEMALE	CLL	A	I	32.8	MUTATED	IGHV2-70	negative	Yes (20%)	M	M	M	No	Untreated	Yes	NA	NA	NA	Yes	No
BC5	LN	46	45.737	FEMALE	CLL	A	I	45.1	MUTATED	IGHV2-70	negative	Yes	No	No	No		Untreated	Yes	NA	NA	NA	Yes	No
BC8	PB	73	75.9616	MALE	CLL	A	I	60	UNMUTATED	IGHV4-39	normal						Treated	No	0	51.1667	77.6082	Yes	No
BC8	LN	73	74.8904	MALE	CLL	A	I	59.4	UNMUTATED	IGHV4-39	negative	Yes	No	No	No	No	Treated	No	0	51.1667	77.6082	Yes	No
BC9	PB	53	53.4329	MALE	CLL	A	II	94	UNMUTATED	IGHV1-69	normal						Treated	No	14.9	56.4333	57.0137	Yes	No
BC9	LN	53	53.4877	MALE	CLL	A	II	86	UNMUTATED	IGHV1-69	negative	Yes	No	No	No	No	Treated	No	14.9	56.4333	57.0137	Yes	Yes
BC9	BM	53	53.4329	MALE	CLL	A	II	84	UNMUTATED	IGHV1-69	normal						Treated	No	14.9	56.4333	57.0137	Yes	No
BC11	BM	52	53.8575	MALE	CLL	A	I	70	UNMUTATED	IGHV3-9	negative	No	No	No	No	No	Treated	No	6.46667	121.667	62.5	Yes	No
BC12	PB	77	77.2904	MALE	CLL	B	I	67.76	UNMUTATED	IGHV2-70	del17p 82%						Untreated	Yes	NA	NA	NA	Yes	No
BC12	LN	77	77.3699	MALE	CLL	B	I	53.94	UNMUTATED	IGHV2-70	nd	No	No	No	Yes	44,X,-Y,-5,-9,-15,i(17)(q10),-19,+mar1,+mar2,+mar3[7]/46,XY[13]	Untreated	Yes	NA	NA	NA	Yes	No
BC13	PB	67	71.6658	MALE	CLL	A	0	75.6	UNMUTATED	IGHV1-2	normal						Treated	Yes	52.2333	NA	NA	Yes	No
BC13	LN	67	72.0384	MALE	CLL	A	0	53.28	UNMUTATED	IGHV1-2	negative	Yes		No	No	No	Treated	Yes	52.2333	NA	NA	Yes	No
BC14	PB	60	71.8877	MALE	CLL	A	0	94	UNMUTATED	IGHV1-69	normal						Treated	Yes	122.367	NA	NA	Yes	No
BC14	LN	60	71.9699	MALE	CLL	A	0	91	UNMUTATED	IGHV1-69	nd	No	Yes (51%)	No	No	No	Treated	Yes	122.367	NA	NA	Yes	No
BC15	PB	56	64.2904	FEMALE	CLL	A	0	78.4	UNMUTATED	IGHV6-1	del17p 6%						Treated	No	19.6	140.467	67.0767	Yes	No
BC15	LN	56	57.263	FEMALE	CLL	A	0	70.56	UNMUTATED	IGHV6-1	nd	No	No	No	No	No	Treated	No	19.6	140.467	67.0767	Yes	No
BC15	LN	56	64.2959	FEMALE	CLL	A	0	69	UNMUTATED	IGHV6-1	del17p 5%						Treated	No	19.6	140.467	67.0767	Yes	No
HD1	LN	72	72.6849	MALE	CLL	A	II	95	MUTATED	IGHV1-18*04; mutated: 5,56 %	NA						Pretreated	Yes	8.1	NA	NA	Yes	No
HD2	LN	77	77.9863	MALE	CLL	B	I	77.2	MUTATED	IGHV4-4*02; mutated: 4,17 %	NA						Untreated	Yes	NA	NA	NA	Yes	No
HD4	LN	79	79.5068	MALE	CLL	B	I	88.6	MUTATED	IGHV4-30-2*034; mutated: 23,74 %	NA						Untreated	Yes	1.03333	NA	NA	Yes	No
HD5	LN	71	71.5863	MALE	CLL	B	I	88.9	UNMUTATED	IGHV3-11*01; mutated: 0 %	NA						Untreated	Yes	14.6667	NA	NA	Yes	No
HD6	LN	76	76.137	MALE	CLL	A	I	78.6	MUTATED	IGHV1-2*02; mutated: 4,51%	NA						Untreated	Yes	6.53333	NA	NA	Yes	No
HD8	LN	72	72.4	MALE	CLL	A	III	NA	MUTATED	IGHV4-34*01, mutated: 7,4%	NA						Untreated	No	16.4	39.6667	NA	Yes	No
HD9	LN	75	75.0548	MALE	CLL	NA	NA	84.3	NA	NA	NA						Untreated	Yes	NA	NA	NA	Yes	No
HD10	LN	70	70.8329	MALE	CLL	B	II	89	MUTATED	IGHV1-46*01; mutated: 7,64%	NA						Untreated	Yes	NA	NA	NA	Yes	No
HD11	LN	69	69.5918	MALE	CLL	A	IV	88	NA	NA	NA						Treated	Yes	19.2667	NA	NA	Yes	No
rLN1	LN	NA	NA	MALE	rLN												NA	NA	NA	NA	NA	Yes	No
rLN2	LN	32	32	MALE	rLN												NA	NA	NA	NA	NA	Yes	No
rLN3	LN	50	50	MALE	rLN												NA	NA	NA	NA	NA	Yes	No
rLN4	LN	39	39	FEMALE	rLN												NA	NA	NA	NA	NA	Yes	No
rLN5	LN	20	20	MALE	rLN												NA	NA	NA	NA	NA	Yes	No
rLN6	LN	49	49	MALE	rLN												NA	NA	NA	NA	NA	Yes	No
rLN7	LN	18	18	MALE	rLN												NA	NA	NA	NA	NA	Yes	No
rLN8	LN	33	33	MALE	rLN												NA	NA	NA	NA	NA	Yes	No
rLN9	LN	20	20	MALE	rLN												NA	NA	NA	NA	NA	Yes	No
rLN10	LN	52	52	FEMALE	rLN												NA	NA	NA	NA	NA	Yes	No
rLN11	LN	34	34	FEMALE	rLN												NA	NA	NA	NA	NA	Yes	No
rLN12	LN	30	30	MALE	rLN												NA	NA	NA	NA	NA	Yes	No
rLN13	LN	59	59	MALE	rLN												NA	NA	NA	NA	NA	Yes	No
