# Supplementary material for: Integrative multi-omics identifies regulatory and exhausted T cell types and novel immunotherapy targets in CLL lymph nodes
Source: Research Square preprint supplement (doi:10.21203/rs.3.rs-3909204/v1), 2024-03-29
Supplement: Supplementary file 3 [file 790c5e0f248143c278d642a3.xlsx]

## Sheet: Sheet1
	Sex	Age (>60)	Tumor load (>84)	IGHV	Treated	Rai (01 vs 234)	BINET (A vs BC)	time to treatment (>15.65)	alive
	adj.pval	adj.pval	adj.pval	adj.pval	adj.pval	adj.pval	adj.pval	adj.pval	adj.pval
Treg CD39	0.699406	0.0219882	0.607017	0.95847	0.891255	0.569171	0.742601	0.715058	1
Treg CM2	0.806441	0.00943102	0.607017	0.907219	0.791874	0.520009	0.780251	0.715058	1
CD4 TCM1 CCR7	1	0.835553	0.861809	0.887939	0.822305	0.86985	0.552172	0.775058	1
CD4 TCM2 CD25	0.699406	0.835553	0.607017	0.887939	0.791874	0.178817	0.817139	0.862263	1
CD4 TCM3	0.634797	0.0686569	0.810655	0.907219	0.958033	0.923988	0.591234	0.524476	1
CD4 TEM CTLA4	0.498966	0.352763	0.936027	0.95847	0.791874	0.532046	0.762541	0.715058	1
CD4 TEM CD39	0.80696	0.509986	0.607017	0.907219	1	0.8818	0.93915	0.852448	1
CD4 TEM NCAM	0.40562	0.240825	0.349867	0.95847	1	0.178817	0.817139	0.775058	1
CD4 TEM PD1	0.897741	0.62347	0.861809	0.907219	0.791874	0.569171	0.552172	0.715058	1
CD4 TEM TBET	0.40562	0.139576	0.349867	0.887939	1	0.178817	1	0.715058	1
TFH	0.699406	0.120392	0.935673	1	0.791874	0.569171	0.552172	1	0.437307
CD4 TN	0.699406	0.020632	1	0.887939	0.791874	0.964396	1	0.775058	1
CD4 TR1	0.40562	0.0429494	0.935673	0.887939	0.822326	0.71404	1	1	1
Treg CM1	0.957516	0.352763	0.810655	0.941378	0.822326	0.665893	0.817139	0.715058	1
Treg PD1	0.699406	0.00943102	0.810655	0.95847	0.958033	0.86985	0.762541	0.715058	1
CD8 TCM	0.634797	0.0987391	0.810655	0.887939	0.883311	0.569171	1	0.715058	1
CD8 TEF TBET	0.699406	0.0734333	0.935673	0.907219	0.791874	0.218438	0.305231	0.715058	1
CD8 TEF NCAM	0.40562	0.110401	0.607017	0.887939	0.791874	0.569171	0.742601	0.715058	1
CD8 TEM GZMK	0.634797	0.29019	0.935673	0.963546	0.822326	0.569171	1	0.715058	1
CD8 TEM TBET GZMK	0.40562	0.618513	0.349867	0.952748	1	0.486971	0.762541	0.775058	1
CD8 TEM TBET	0.748843	0.226688	0.607017	0.887939	0.822326	0.178817	0.762541	0.862263	1
CD8 TEX CD39	0.634797	0.014218	0.744716	0.887939	0.791874	0.86985	0.305231	0.715058	1
CD8 TEX CD38	0.40562	0.108417	0.727796	0.907219	1	0.665893	0.762541	0.775058	1
CD8 TN	0.40562	0.00943102	0.936027	0.95847	0.791874	0.86985	1	0.775058	1
DN TEF CD38	0.40562	1	0.810655	0.907219	1	0.665893	1	0.775058	0.982972
DN TEF TBET	0.631319	0.0529179	0.607017	0.887939	0.791874	0.334472	1	0.715058	1
DN TEM KLRG1	0.699406	0.0219882	0.810655	0.941378	0.791874	0.178817	0.552172	0.715058	1
DN TEM HELIOS	0.699406	0.0219882	0.810655	0.907219	0.822326	0.665893	0.408827	0.715058	1
TEM ICOS	0.40562	0.404039	0.607017	0.887939	0.791874	0.8818	1	0.862263	1
TPR	0.40562	0.014218	0.607017	0.907219	1	0.86985	0.591234	0.715058	1
Adj. Pval <0.01
