# Supplementary material for: Integrative multi-omics identifies regulatory and exhausted T cell types and novel immunotherapy targets in CLL lymph nodes
Source: Research Square preprint supplement (doi:10.21203/rs.3.rs-3909204/v1), 2024-03-29
Supplement: Supplementary file 4 [file 87a76b2f7b565facc55121c2.xlsx]

## Sheet: Clusters_CyTOF
CyTOF
Cluster (old name)	New name	Dist. features	Functionality	Lineage	Comments
Mixed TEX Proliferation	TPr	KI67+	Proliferating	Mixed
DN TEM2 HELIOS+	DN TEM HELIOS	HELIOS+	Double Negative cytotoxic	CD4-CD8-
DN TEF1	DN TEF CD38	CD38+		CD4-CD8-
CD4 Treg1 Helios-	Treg CM1	CCR7+ HELIOS-	Regulatory	CD4+	No distinctive marker
CD4 Treg3 CD39+	Treg PD1	CD39hi PD1hi CD25-		CD4+
CD4 aTreg4	Treg CD39	CD39+ CD25hi		CD4+
CD4 rTreg2	Treg CM2	CTLA4- CD25-		CD4+	No distinctive marker
CD4 TEM CTLA4+CD38+	CD4 TEM CTLA4	CTLA4+ CD38+ICOS+	Effector memory	CD4+
CD4 TFH PD-1hi	TFH	PD1hi TCF1+ ICOS+	Follicular T helper	CD4+
CD4 TEM PD-1+	CD4 TEM PD1	PD1+ TCF1+	Effector memory	CD4+
CD4 TR1	CD4 TEM GZMK	GZMK+ EOMES+	Cytotoxic	CD4+	Or TR1?
CD4 TEM CD39+CD38+	CD4 TEM CD39	CD3 low	Effector memory	CD4+
CD8 TEF1	CD8 TEF TBET	TBET+ GZMK+	Cytotoxic	CD8+
CD8 TEF2 NCAM+	CD8 TEF NCAM	NCAM+ GZMK-HELIOS+	Effector memory	CD8+
CD8 TEM TBET+	CD8 TEM TBET	GZMK- TBET+		CD8+
DN TEM1 KLRG1+	DN TEM KLRG1	GZMK+ TBET+KLRG1+	Cytotoxic	DN
DN TEF2 HELIOS+	DN TEF TBET	TIGIT+ HELIOS+ TBET+	Effector memory	DN
CD8 TEX1 CD39+	CD8 TEX CD39	CD39+ PD-1+	Cytotoxic/ exhausted	CD8+
CD8 TEX2	CD8 TEX CD38	CD38+ PD-1+		CD8+
CD8 TEM KLRG1+TBET+	CD8 TEM TBET GZMK	GZMK+ TBET+	Cytotoxic	CD8+
CD8 TEM GZMK+	CD8 TEM GZMK	GZMKhi		CD8+
CD8 TCM	CD8 TCM	-	Central memory	CD8+
CD8 TN	CD8 TN	-	Naïve	CD8+
Mixed ICOShi	TEM ICOS	ICOS+	Cytotoxic	Mixed
CD4 TEM NCAM+	CD4 TEM NCAM	NCAM+ GZMK+		CD4+
CD4 TEM TBET+	CD4 TEM TBET	TBET+ KLRG1+	Effector memory	CD4+
CD4 TCM2	CD4 TCM2 CD25	CD25+	Central memory	CD4+
CD4 TCM1	CD4 TCM1 CCR7	-		CD4+
CD4 TCM3	CD4 TCM3	-		CD4+	No distinctive marker
CD4 TN	CD4 TN	-	Naïve	CD4+

## Sheet: Clusters_scRNAseq
scRNAseq
Cluster	Subset name (old)	Dist. features	Functionality	Lineage	New name
C11	TPr	-	Proliferating	Mixed	TPr
C0	CD4+ TN	-	Naïve	CD4+	CD4 TN
C4	CD4+ THCM1	KLF2+ CD69-	Conventional T helper	CD4+	TH KLF2
C1	CD4+ THCM2	KLF2- CD69+			TH CD69
C6	TFH	-	Follicular T helper	CD4+	TFH
C5	TREG		Regulatory	CD4+	TREG
C7	CD8+ TN	-	Naïve	CD8+	CD8 TN
C2	TTOX EM1	CCL5hi	Cytotoxic	CD8+	TEM CCL5
C3	TTOX EM2	LYAR+		CD8+	TEM LYAR
C10	TTOX EM3	GZMK+		CD4+	TEM GZMK
C8	TEX	Loss of GZMs	Terminally exhausted	CD8+	TEX

## Sheet: Clusters_multiplex
Multiplex
Quantification of immune cell subsets
	CD8 TEM PD1+ cells	CD8 TEM/CM PD1- cells	CD4 TEM PD1+ cells	CD4 TEM/CM PD1- cells	Tregs	B cells prolif	Myeloid
Positive for	CD45	CD45	CD45	CD45	CD45	CD45	CD45
	CD3D	CD3D	CD3D	CD3D	CD3D	CD20	CD68
	CD8A	CD8A	CD4	CD4	CD4	KI67	PD-L1
	CD45RO	CD45RO	CD45RO	CD45RO	CD45RO	PCNA	CD163
	PD-1		PD-1		FOXP3
Negative for	PCNA	PD-1	FOXP3	PD-1	PCNA	CD68	PCNA
	KI67	PCNA	PCNA	FOXP3	CD163	CD4	CD4
	CD68	KI67	KI67	PCNA	CD68*	FOXP3	FOXP3
	CD4	CD68	CD68	KI67	CD8A	CD45RO	CD45RO
	FOXP3	CD4	CD8A	CD68		CD8a	CD8A
	CD163	FOXP3	CD163	CD8A		CD3D	CD3D
		CD163		CD163		PD-1	PD-1
Not considered	CD20	CD20	CD20	CD20	CD20	PD-L1	CD20
	PD-L1	PD-L1	PD-L1	PD-L1	PD-L1	CD163	PD-L1
	CD31	CD31	CD31	CD31	PD-1	CD31	KI67
					CD31		CD31
					KI67
