# Supplementary material for: Integrative multi-omics identifies regulatory and exhausted T cell types and novel immunotherapy targets in CLL lymph nodes
Source: Research Square preprint supplement (doi:10.21203/rs.3.rs-3909204/v1), 2024-03-29
Supplement: Supplementary file 5 [file 9d9917ffd8c6c7387b77e7b6.xlsx]

## Sheet: KEY RESOURCE TABLE
REAGENT or RESOURCE	SOURCE	IDENTIFIER	Experiment/ Purpose
Antibodies
Human anti-CD45 (clone HI30)	Biolegend	Cat# 304005; RRID: AB_314393	Flow cytometry
Human anti-CD5 (clone UCHT2)	Biolegend	Cat# 300612; RRID: AB_314098	Flow cytometry
Human anti-CD19 (clone HIB19)	Biolegend	Cat# 302206; RRID: AB_314236	Flow cytometry
Human anti-CD3 (clone HIT3a)	BD Biosciences	Cat# 555340; RRID: AB_395746	Flow cytometry
Anti-mouse CD45 (clone 30F-11)	Biolegend	Cat# 103107; RRID: AB_312972 Cat# 103131; RRID: AB_893344	Flow cytometry
Anti-mouse CD5 (clone 53-7.3)	BD Biosciences	Cat# 11-0051-81; RRID: AB_464907, Cat# MA5-17784; RRID: AB_2539168, Cat# 17- 0051-81; RRID: AB_469330 or Cat# 563194; RRID: AB_2738061	Flow cytometry
Anti-mouse CD19 (clone eBio1D3)	ThermoFisher	Cat# 11-0193-82; RRID: AB_657666, Cat# 12-0193-81; RRID: AB_657661	Flow cytometry
Anti-mouse CD3e (clone 145-2C11)	ThermoFisher	Cat# 11-0031-82; RRID: AB_464882	Flow cytometry
Anti-mouse CD8a (clone 53-6.7)	Biolegend	Cat# 100713; RRID: AB_312752, Cat# 100743; RRID: AB_2561352	Flow cytometry
Anti-mouse CD4 (clone GK1.5)	Biolegend	Cat# 100414; RRID: AB_312699, Cat# 100434; RRID: AB_893324	Flow cytometry
Anti-mouse CD44 (clone IM7)	ThermoFisher	Cat# A25989; RRID: AB_2536050, Cat# 56- 0441-82; RRID: AB_494011, Cat# A14791; RRID: AB_2534306	Flow cytometry
Mouse anti-CD127 (clone A7R34)	Biolegend	Cat# 135010; RRID: AB_1937251, Cat# 135012: RRID: AB_1937216, Cat# 135014; RRID: AB_1937265	Flow cytometry
Anti-mouse PD-1 (clone RMP1-30)	Biolegend	Cat# 109104; RRID: AB_313421, Cat# 109112; RRID: AB_10612938, Cat# 109116; RRID: AB_2566548	Flow cytometry
Anti-mouse CD39 (clone Duha59)	Biolegend	Cat# 143811; RRID: AB_2750321	Flow cytometry
Anti-mouse FOXP3 (clone FJK-16s)	ThermoFisher	Cat# 48-5773-82; RRID: AB_1518812	Flow cytometry
Anti-mouse TIM-3 (clone RMT3-23)	ThermoFisher	Cat# 67-5870-82; RRID: AB_2744892	Flow cytometry
Anti-mouse Galectin-9 (clone 108A2)	Biolegend	Cat# 137903; RRID: AB_10568785	Flow cytometry
Anti-mouse CD107a (LAMP-1) (clone eBio1D4B9)	ThermoFisher	Cat# 12-1071-8; RRID: AB_657556	Flow cytometry
Anti-mouse CD8 BV421 Clone: 53-6.7	Biolegend	Biolegend (100738); RRID: AB_11204079	Flow cytometry
Anti-mouse CD127 FITC Clone: A7R34	Biolegend	Biolegend (135008); RRID: AB_1937232	Flow cytometry
Anti-mouse CD39 PECy7 Clone: Duha59	Biolegend	Biolegend (143805); RRID: AB_2563393	Flow cytometry
Anti-mouse CD4 PE Clone: GK1.5	Biolegend	Biolegend(100408); RRID:AB_312693	Flow cytometry
Anti-mouse CD44 AF700 Clone: IM7	Biolegend	Biolegend (103026); RRID: AB_493713	Flow cytometry
Anti-mouse CD279 PD1 Clone: REA802	Biolegend	Miltenyi (130-111-954); RRID: AB_2656932	Flow cytometry
Anti-mouse PD-L1 BV605 Clone: 10F.9G2	Biolegend	Biolegend (124321); RRID: AB_2563635	Flow cytometry
Anti-mouse CD44 BV421 Clone: IM7	Biolegend	Biolegend (103039); RRID: AB_2616903	Flow cytometry
Anti-mouse CD11c PerCP5.5 Clone: N418	Biolegend	Biolegend (117328); RRID: AB_2129641	Flow cytometry
Anti-mouse CD11b FITC Clone: M1/70	Biolegend	Biolegend (101205); RRID: AB_312789	Flow cytometry
Anti-mouse Gr1 PECY7 Clone: RB6-8C5	Biolegend	Biolegend (108416); RRID: AB_313381	Flow cytometry
Anti-mouse CX3CR1 PE (clone: SA011F11)	Biolegend	Miltenyi (149005); RRID: AB_2564314	Flow cytometry
Anti-mouse L/D NIR	Biolegend	Biolegend (423106)	Flow cytometry
Anti-mouse CD45 APC Clone:30-F11	Biolegend	Biolegend (103112); RRID:AB_312977	Flow cytometry
Anti-mouse CD5 PE Clone: 53-7.3	Biolegend	Biolegend (100608); RRID: AB_312737	Flow cytometry
Anti-mouse CD19APC Clone: 6D5	Biolegend	Biolegend (115512); RRID: AB_313647	Flow cytometry
Anti-mouse CD44 BV421 Clone: IM7	Biolegend	Biolegend (103039); RRID:AB_2616903	Flow cytometry
Anti-mouse CD62L PerCP5.5 (clone: MEL-14 (RUO))	BD Biosciences	BD (51626440); RRID: AB_10611578	Flow cytometry
Anti-mouse CD4 FITC Clone: RM4-5	Biolegend	Biolegend(100510); RRID: AB_312713	Flow cytometry
Anti-mouse CD8 PE DAZZLE Clone: 53-6.7	Biolegend	Biolegend(100761); RRID: AB_2564027	Flow cytometry
Anti-mouse Tim3 PE Clone: RMT3-23	Biolegend	Biolegend (119704); RRID: AB_345378	Flow cytometry
Anti-mouse Foxp3 AF700 Clone: MF-14	Biolegend	Biolegend (126421); RRID: AB_2750493	Flow cytometry
Anti-mouse IFNg PECY7Clone: XMG1.2	Biolegend	Biolegend (505836); RRID: AB_2650928	Flow cytometry
Anti-mouse CD107 PE Clone: 1D4B	Biolegend	Biolegend (121611); RRID: AB_2134487	Flow cytometry
Anti-mouse TNFa APC Clone: MP6-XT22	Biolegend	Biolegend (506308); RRID:AB_315429	Flow cytometry
Zombie Red	Biolegend	Biolegend (423109)	Flow cytometry
InVivoMab anti-mouse Galectin-9	Bio X Cell	Bio X Cell (BE0218) RRID:AB_2687702	In vivo blocking
InVivoMab rat IgG2b isotype control	Bio X Cell	Bio X Cell (BE0090) RRID:AB_1107780	In vivo blocking
InVivoPure pH 7.0 Dilution Buffer	Bio X Cell	Bio X Cell (IP0070)	In vivo blocking
Chemicals, peptides and recombinant proteins
4’,6-diamidino-2-phenylindole (DAPI)	Sigma-Aldrich	D9542-1MG
eBioscience fixable viability dye 506	ThermoFisher	Cat# 65-0863-14, 65-0866-14, 65-0865-14
10% Tween 20	Biomol GmbH, Hamburg, Germany	E108	scRNA sequencing
2-Mercaptoethanol (55 mM)	Thermo Fisher Scientific, Waltham, USA	21985-023	Cell culture
Agencourt® AMPure® XP, 60 mL	Beckman Coulter, Brea, USA	A63881	scRNA sequencing
Dimethylsulfoxid (DMSO)	Sigma-Aldrich, Steinheim, Germany	41639	Freezing medium
Dulbecco’s Modified Eagle’s Medium (DMEM)	Sigma-Aldrich, Steinheim, Germany	D6046	Cell culture
Dulbecco’s Phosphate Buffered Saline (PBS)	Sigma-Aldrich, Steinheim, Germany	D8537	Misc.
DynabeadsTM MyOneTM SILANE	10x Genomics, Pleasanton, USA	PN-2000048	scRNA sequencing
eBioscience 1-Step Fix/Lyse Solution	Thermo Fisher Scientific, Waltham, USA	00-5333-57	Flow Cytometry Staining
eBioscience Cell Stimulation Cocktail (500X)	Thermo Fisher Scientific, Waltham, USA	00-4970-93	T-cell stimulation
eBioscience Fixable Viability Dye eFluor 506	Thermo Fisher Scientific, Waltham, USA	65-0866-14	Flow Cytometry Staining
eBioscience Protein Transport Inhibitor Cocktail	Thermo Fisher Scientific, Waltham, USA	00-4980-93	T-cell stimulation
Ethanol	Fisher Scientific GmbH, Schwerte, Germany	10342652	Misc.
Fetal Bovine Serum (FBS)	Sigma-Aldrich, Steinheim, Germany	F7524	Misc.
Gibco HEPES (1 M)	Thermo Fisher Scientific, Waltham, USA	15630056	Cell culture
Gibco L-Glutamine (200 mM)	Thermo Fisher Scientific, Waltham, USA	25030024	Cell culture
Gibco MEM Non-Essential Amino Acids Solution (100X)	Thermo Fisher Scientific, Waltham, USA	11140035	Cell culture
Gibco Penicillin/Streptomycin (10,000 U/mL)	Thermo Fisher Scientific, Waltham, USA	15140122	Cell culture
Glycerol (50%), Sterile Solution	BioVision BV, Milpitas, USA	B1012-100	scRNA sequencing
High Sensitivity D1000 Reagents	Aligent Technologies, Santa Clara, USA	5067-5585	scRNA sequencing
High Sensitivity D5000 Reagents	Aligent Technologies, Santa Clara, USA	5067-5593	scRNA sequencing
Invitrogen 123count eBeads Counting Beads	Thermo Fisher Scientific, Waltham, USA	01-1234-42	Flow Cytometry Staining
Normal Rat Serum	Jackson ImmunoResearch Laboratories, West Grove, USA	012-000-120	Cell isolation
RNAse free water	Ambion, Carlsbad, USA	AM9937	Misc.
RPMI-1640	Sigma-Aldrich, Steinheim, Germany	R8758	Cell culture
Sodium Pyruvate (100 mM)	Thermo Fisher Scientific, Waltham, USA	11360039	Cell culture
Buffer
eBioscience Foxp3 / Transcription Factor Staining Buffer Set	Thermo Fisher Scientific, Waltham, USA	00-5523-00	Flow Cytometry Staining
eBioscience IC Fixation Buffer	Thermo Fisher Scientific, Waltham, USA	00-8222-49	Flow Cytometry Staining
eBioscience Permeabilization Buffer (10X)	Thermo Fisher Scientific, Waltham, USA	00-8333-56	Flow Cytometry Staining
FACS buffer	PBS + 2% FCS	n.a	Flow Cytometry Staining
Freezing media	90% FCS + 10% DMSO	n.a	Cryopreservation
MACS buffer	Miltenyi Biotec, Bergisch Gladbach, Germany	130-091-221	Cell isolation
Qiagen Buffer EB	Qiagen, Hilden, Germany	19086	scRNA sequencing
RBC Lysis Buffer (10X)	Biolegend, San Diego, USA	420301	Cell isolation
Critical commercial assays
CD90.2 MicroBeads, mouse	Miltenyi Biotec, Bergisch Gladbach,Germany	130-121-278	Cell isolation
Chromium™ i7 Multiplex Kit, 96 rxns	10x Genomics, Pleasanton, USA	120262	scRNA sequencing
Chromium™ Single Cell 3'/5' Library Construction Kit, 16 rxns	10x Genomics, Pleasanton, USA	PN-1000020	scRNA sequencing
Chromium™ Single Cell 3’ Library & Gel Bead Kit v2, 4 rxns	10x Genomics, Pleasanton, USA	PN-120267	scRNA sequencing
Chromium™ Single Cell 5’ Library & Gel Bead Kit, 4 rxns	10x Genomics, Pleasanton, USA	PN-1000014	scRNA sequencing
Chromium™ Single Cell A Chip Kit, 16 rxns	10x Genomics, Pleasanton, USA	PN-1000009	scRNA sequencing
Chromium™ Single Cell V(D)J Enrichment Kit, Human T Cell, 96 rxns	10x Genomics, Pleasanton, USA	PN-1000005	scRNA sequencing
Chromium™ Single Cell V(D)J Enrichment Kit, Mouse T Cell, 96 rxns	10x Genomics, Pleasanton, USA	PN-1000071	scRNA sequencing
Easysep Mouse Pan-B Cell Isolation Kit	Stemcell Technologies, Vancouver, Canada	19844	Cell isolation
Qubit dsDNA HS Assay Kit	Thermo Fisher Scientific, Waltham, USA	Q32854	scRNA sequencing
Deposited data
Human single-cell RNA- and TCR-sequencing data	European Genome-phenome Archive (EGA)	accession ID (Pending)
Mouse single-cell RNA- and TCR-sequencing data	Gene Expression Omnibus	accession ID (Pending)
Experimental models: organisms/ strains
Mouse: C57BL/6 (WT)	Charles River Laboratories	N/A
Mouse: Eµ-TCL1 (B6-Tg(Igh-V186.2-TCL1A)3Cro)	Bichi et al., 2002	MGI: 3527221

## Sheet: CyTOF
Antibody	Isotope	Clone	Ref #	Supplier	Staining
2B4	113In*#	C1.7	329502	Biolegend	Surface
CD127/IL-7Ra	149Sm	A019D5	3149011B	Fluidigm	Surface
CD134/OX40	158Gd	ACT35	3158012B	Fluidigm	Surface
CD137/4-1BB	173Yb	4B4-1	3173015B	Fluidigm	Surface
CD152/CTLA4	170Er	14D3	3170005B	Fluidigm	Surface
CD185/CXCR5	171Yb	51505	3171006B	Fluidigm	Surface
CD19	139La*#	HIB19	302202	Biolegend	Surface
CD197/CCR7	167Er*	G043H7	353202	Biolegend	Surface
CD223/LAG3	165Ho	11C3C65	3165037B	Fluidigm	Surface
CD25	169Tm	2A3	3169003B	Fluidigm	Surface
CD27	155Gd	L128	3155001B	Fluidigm	Surface
CD278/ICOS	148Nd	C398.4A	3148019B	Fluidigm	Surface
CD279/PD1	174Yb	EH12.2H7	3174020B	Fluidigm	Surface
CD3	141Pr*	UCHT1	300402	Biolegend	Surface
CD357/GITR	159Tb	621	3159020B	Fluidigm	Surface
CD38	144Nd	HIT2	3144014B	Fluidigm	Surface
CD39	160Gd	A1	3160004B	Fluidigm	Surface
CD4	145Nd*	RPA-T4	300502	Biolegend	Surface
CD44	166Er	BJ18	3166001B	Fluidigm	Surface
CD45	89Y	HI30	3089003B	Fluidigm	Surface
CD45RA	143Nd	H100	3143006B	Fluidigm	Surface
CD45RO	164Dy	UCHL1	3164007B	Fluidigm	Surface
CD47	209Bi	CC2C6	3209004B	Fluidigm	Surface
CD56/NCAM	176Yb	NCAM16.2	3176008B	Fluidigm	Surface
CD7	147Sm	CD7-6B7	3147006B	Fluidigm	Surface
CD73	168Er	AD2	3168015B	Fluidigm	Surface
CD8a	146Nd*	RPA-T8	301002	Biolegend	Surface
CD95/Fas	152Sm	DX2	3152017B	Fluidigm	Surface
Cisplatin viability	195Pt		201064	Fluidigm
DNA content	191/193Ir		201192	Fluidigm
EOMES	175Lu*	WD1928	14-4877-82	ebioscience	Intracellular
FOXP3	162Dy	259D/C7	3162024A	Fluidigm	Intracellular
Granzyme K	142Nd*	GM26E7	370502	Biolegend	Intracellular
HELIOS	156Gd*	22F6	137202	Biolegend	Intracellular
HLA-DR	151Eu	G46-6	3151023B	Fluidigm	Surface
Ki-67	172Yb	B56	3172024B	Fluidigm	Intracellular
KLRG1	115In*#	SA231A2	367702	Biolegend	Surface
T-bet	161Dy	4B10	3161014B	Fluidigm	Intracellular
TCF1	163Dy*	7F11A10	655202	Biolegend	Intracellular
TIGIT	153Eu	MBSA43	3153019B	Fluidigm	Surface
TIM3	154Sm	F38-2E2	3154010B	Fluidigm	Surface
TOX	150Nd*	TXRX10	14-6502-82	ebioscience	Intracellular
markers excluded for clustering of T cells
Isotopes marked with * were conjugated in-house to respective purified monoclonal IgG antibodies (supplier
and ref are indicated in the table) with the Maxpar® X8 Multimetal Labeling kit (Fluidigm, ref. 201300) according
to the manufacturer’s instructions. Isotopes marked with # were purchased from Trace Sciences International
(113In) or Sigma-Aldrich (115In, 139La).

## Sheet: 4-color IF
			Primary antibody				Secondary antibody		Opal fluorophore
Antigen (clone)	Antigen Retrieval	Blocking	Concentration	Catalog Number	Source	RRID	Concentration	Company	Dye	Concentration
CD3 (polyclonal)	AR9	Opal, 10 minutes	1:50	A0452	Agilent	AB_2335677	anti-rabbit 1:5	OPAL	Opal 780	1:25
CD8 (SP239)	pH8 EDTA buffer	Opal, 10 minutes	1:50	ab178089	Abcam	AB_2756374	anti-rabbit 1:5	OPAL	Opal 570/ 520	1:100
TIM3 (2321C)	AR9	Opal, 10 minutes	1:50	MAB23652-SP	R&D Systems	NA	anti-rabbit 1:5	OPAL	Opal 690	1:100

## Sheet: 18-color IF
Antibodies
Biomarker	Fluorophore	Purpose	Clone	Secondary
DNA	SYTOX Blue	Cell ID	N/A
PCNA	ArgoFluor 430		PC10
CD31	ArgoFluor 515	Endothelium	EPR3094
CD45	ArgoFluor 555L	Leukocyte	HI30
CD68	ArgoFluor 535	Macrophage	KP1 + C68/684
CD4	ArgoFluor 572	T Helper	NIUG0
FOXP3	ArgoFluor 584	T Regulatory	236A/E7
CD45RO	ArgoFluor 602	Memory	UCHL1
CD8a	ArgoFluor 624	T Cytotoxic	AMC908
CD20	ArgoFluor 660L	B cell	L26
PD-L1	ArgoFluor 662	Checkpoint	E1L3N
CD3d	ArgoFluor 686	T cell	EP4426
CD163	ArgoFluor 706	Macrophage	EPR14643
E-Cadherin	ArgoFluor 730	Epithelium	4A2
PD-1	ArgoFluor 760	Checkpoint	D4W2J
Ki67	ArgoFluor 795	Proliferation	20Raj1
Pan-CK (DIG)	ArgoFluor 845	Epithelium	AE1/AE3/C11	ArgoFluor 845 anti-DIG (clone - HY-A.1)
	channels that were excluded from analysis
Materials
Reagents / Consumables	Details	Qty	Vendor	Cat
Microtiter plate lids	Corning™ General Assay Microplate Lids	2	Fisher Scientific	07-200-598
Spray Bottle	General item
Coverslips	Cover glass #1.5, 24 mm x 50 mm	1	VWR	48393-241
Microscope Slides	SuperFrost Plus	1	VWR	48311-703
Kimwipes	General item
Hydrophobic slide labels	24 mm x 22 mm		DAKO	14006902
EZ-AR 2 Elegance AR buffer	EDTA-based; pH 8.5		BioGenex	#HK547-XAK
1X PBS	General item
35% H202	General item
1M NaOH	General item
70% EtOH	General item
Vectashield Vibrance	Antifade Coverslip mounting media	1	Vector Laboratories	H-1700
CyteMount™ Media	Coverslip mounting media	1	RareCyte	42-1056-000
10% Triton X-100	Triton™ X-100 Surfact-Amps™ Detergent Solution	1	ThermoFisher	28314
PBS-Antibody Stabilizer	Antibody Stabilizer PBS	1	Candor Bioscience	131500
Mouse serum	Mouse Serum	1	Sigma-Aldrich	M5905-500ML
Goat serum	Gibco Goat Serum	1	ThermoFisher	16210064
Rabbit serum	Rabbit Serum	1	Millipore Sigma	R4505-100ML
Equipment	Details	Qty	Vendor	Cat
EZ-Retriever® System	110V WITH TRANSFORMER	1	BioGenex	MW014-MO
White Light Box	15,000 lux A4 Size Sunlight Therapy Table Lamp | Order link	2	AMZCool	B07PBWQJK2
Light Box Riser	High-Temperature Tapered Caps | Order link	4	McMaster-Carr	4491K38
	UltraBright Dual Wavelength 302/365nm, 21 cm x 26 cm | Order link
UV Transilluminator		1	Transilluminators.com	NEB-MLB-21
	Simport Stain Tray M920-2 ABS Plastic Slide Staining System with Black Lid | Order link
Slide humidity tray		1	Amazon	M920-2
Coplin jars	DWK Life Sciences Wheaton™ Staining Jars, 8-10 Slide Unit	1	Fisher Scientific	22-309-247

## Sheet: Software
REAGENT or RESOURCE	SOURCE	IDENTIFIER	Experiment/ Purpose
Affinity Designer	Serif Ltd, West Bridgford	1.8.2.620	Figure creation
BD FACSDivaTM	BD Bioscience, Heidelberg, Germany	3149011B	Flow cytometry data acquisition
CyTOF® Software	Fluidigm, Canada Inc., ON, Canada	6.7.1014	Mass cytometry data acquisition
EndNoteTM X9	Thomson Reuters, Carlsbad, USA	19.3.1.13758	Bibliography management
FlowJo X 10.0.7 software	BD (Becton, Dickinson & Company), OR, USA	X 10.0.7	Flow cytometry analysis
GraphPad Prism V7.05 (2018)	GraphPad Software, San Diesgo, USA	39177	Statistical analysis, graph creation
QuPath	Bankhead et al., 2017		Image analysis
Bioconductor package: limma (3.50.3)	Smyth, 2004		CyToF data analysis
R packages: ggplot and Heatmap3	Wickham et al., 2009; Zhao eet al., 2014		Single-cell data analysis
Bioconductor package: Seurat (4.1.0)	Hao et al., 2019		Single-cell data analysis
Bioconductor package: scRepertoire (1.4.0)	Borcherding et al., 2020		Single-cell data analysis
Bioconductor package: DoubletFinder (2.0.3)	McGinnis et al., 2019		Single-cell data analysis
Bioconductor package: harmony (1.0)	Korsunsky et al., 2019		Single-cell data analysis
Bioconductor package: tradeSeq (1.8.0)	Van den Berge et al., 2020		Single-cell pseudotime analysis
Bioconductor package: destiny (3.8.1)	Angerer et al., 2016		Single-cell pseudotime analysis
Bioconductor package: liana (0.0.5)	Dimitrov et al., 2022		cell interaction analysis
Bioconductor package: OmnipathR (3.2.8)	Türei et al., 2016		cell interaction analysis
Bioconductor package: CellChat (1.1.3)	Jin et al., 2021		cell interaction analysis
